# Supplementary material for: Synthesis and characterization of polyaniline nanoparticles with enhanced microwave absorption
Source: Royal Society of Chemistry journal article supplement (doi:10.1039/c3ra40973b), 2013-01-01
Supplement: c3ra40973b.pdf [file c3ra40973b.pdf]

## Supporting Information

# Synthesis and Characterization of Polyaniline Nanoparticles with Enhanced Microwave Absorption

Peng Zhang, Xijiang Han,\* Rong Qiang, Ping Xu, Wenwen Liu, Leilei Kang and Yunchen Du\*

*Department of Chemistry, Harbin Institute of Technology, Harbin 150001, China*

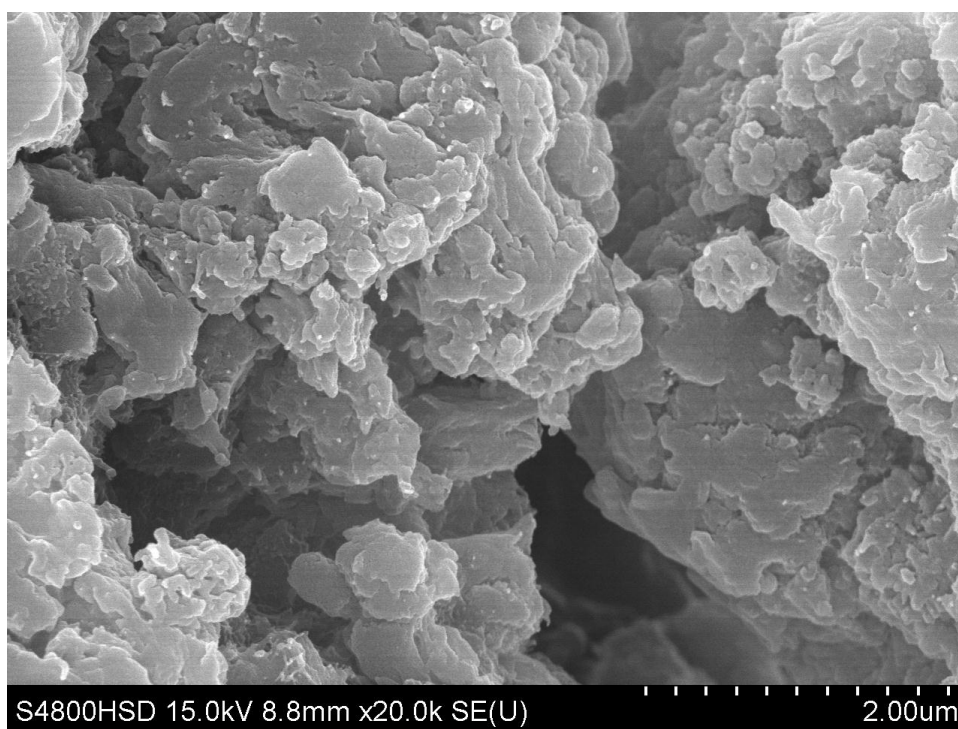

Figure S1 SEM image of C-PANI.

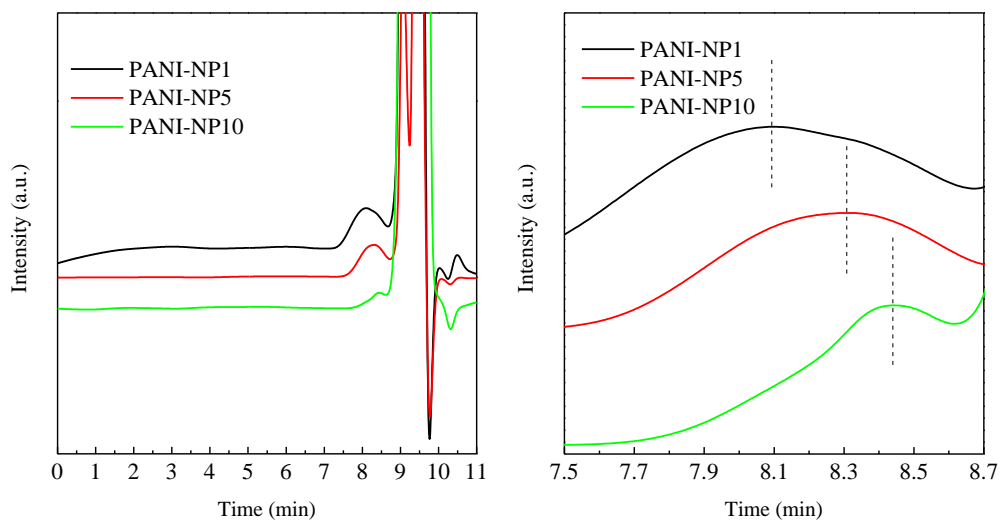

Fig. S2 The elution profiles of PANI-NP1, PANI-NP5 and PANI-NP10 in GPC (left); the magnification of the range from 7.5 to 8.7 min (right).

**Table S1** The relative molecule weights from GPC.

|           | <i>M<sub>n</sub></i> | <i>M<sub>w</sub></i> | <i>M<sub>z</sub></i> |
|-----------|----------------------|----------------------|----------------------|
| PANI-NP1  | 271.11               | 286.95               | 303.01               |
| PANI-NP5  | 251.64               | 264.68               | 278.06               |
| PANI-NP10 | 245.38               | 260.18               | 275.04               |

*M<sub>n</sub>*: Number-average molecular weight;

*M<sub>w</sub>*: Weight-average molecular weight;

*M<sub>z</sub>*: Z-average molecular weight;

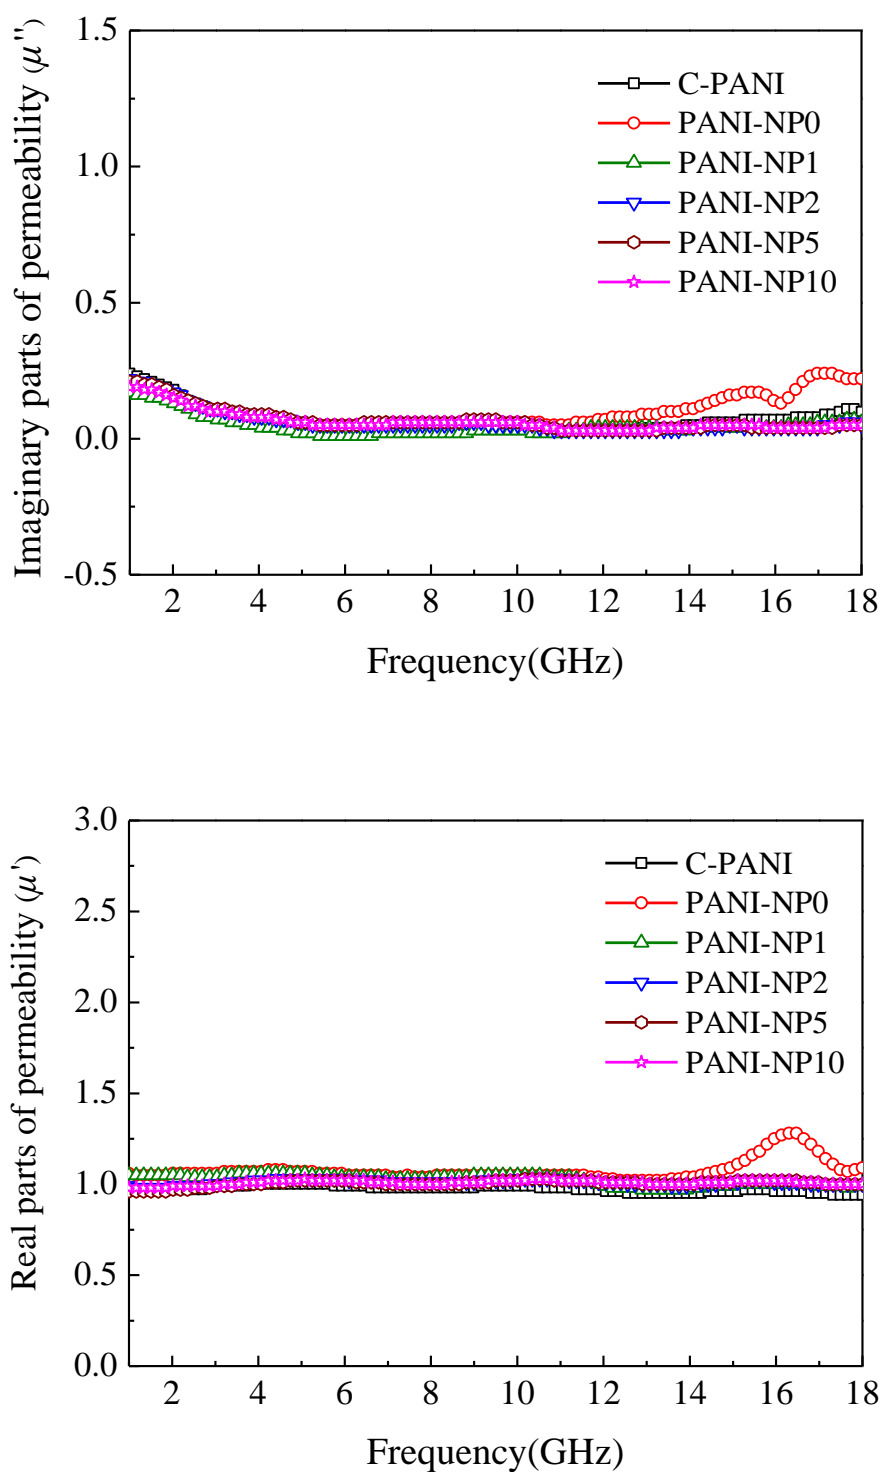

Figure S3 Real parts ( $\mu'$ ) and imaginary parts ( $\mu''$ ) of complex permeability of C-PANI and PANI-NP<sub>x</sub> in the frequency range of 1-18 GHz.

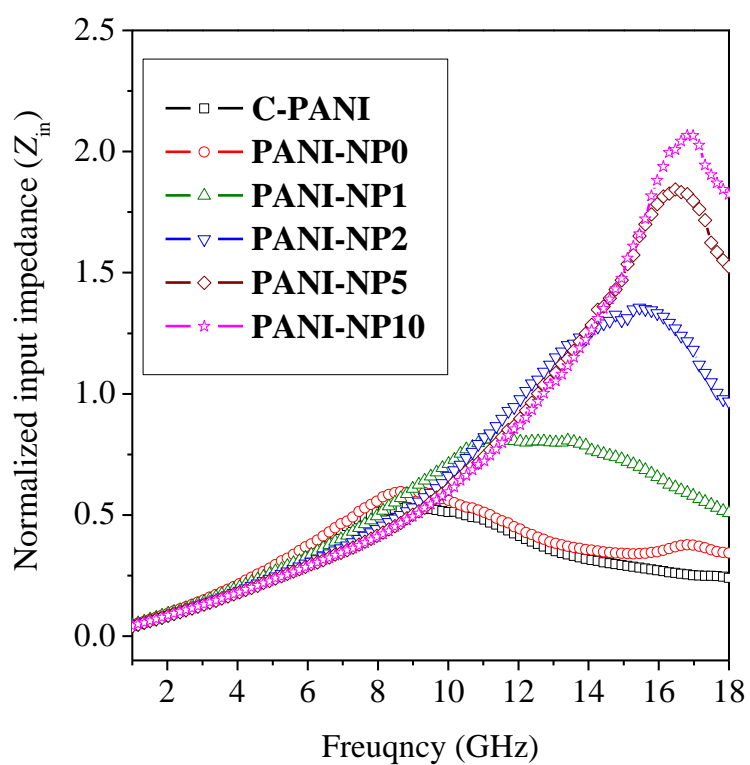

Fig. S4 Normalized input impedance ( $Z_{in}$ ) of C-PANI and PANI-NP $x$  with an absorber thickness of 2 mm in the frequency range of 1-18 GHz.
